# Supplementary material for: Elevated SLC1A5 links to inflamed endothelial cells and proteinuria in membranous nephropathy patients
Source: PeerJ. 2025 Oct 31;13:e20271. doi: 10.7717/peerj.20271 (PMC12581921; doi:10.7717/peerj.20271)
Supplement: Supplemental Information 3 [file peerj-13-20271-s003.xlsx]

## Sheet: Sheet1
tre	SLC1A5	pg/ml
Normal	20.5
Normal	28.5
Normal	30.5
Normal	23.5
Normal	20
Normal	23.5
Normal	24
Normal	27.5
Normal	20
Normal	22.5
Normal	23.5
Normal	27
Normal	22.5
Normal	20
Normal	21.5
Normal	26
Normal	18.5
Normal	20
Normal	19
Normal	25
Normal	28
Normal	14
Normal	21
Normal	25
Normal	25
Normal	21
Normal	20.5
Normal	19.5
Normal	19.5
Normal	27.5
Normal	27.5
MN	70.96
MN	163.735
MN	160.75
MN	115.16
MN	139.88
MN	135.28
MN	137.905
MN	142.525
MN	155.735
MN	206.765
MN	140.32
MN	133.975
MN	125.555
MN	121.925
MN	150.545
MN	156.625
MN	138.125
MN	115.79
MN	136.37
MN	112.85
MN	96.95
MN	138.78
MN	78.065
MN	141.42
MN	135.935
MN	140.98
MN	125.77
MN	122.14
MN	126.415
MN	135.715
MN	144.965
MN	192.8
MN	120.65
MN	135.715
MN	114.32
MN	123.42
MN	135.065
MN	114.11
MN	128.78
MN	101.86
MN	146.745
MN	123.205
MN	136.155
MN	127.27
MN	130.72
MN	144.965
MN	138.78
MN	153.25
MN	144.965
MN	100.835
