# Supplementary material for: Elevated SLC1A5 links to inflamed endothelial cells and proteinuria in membranous nephropathy patients
Source: PeerJ. 2025 Oct 31;13:e20271. doi: 10.7717/peerj.20271 (PMC12581921; doi:10.7717/peerj.20271)
Supplement: Supplemental Information 4 [file peerj-13-20271-s004.xlsx]

## Sheet: Sheet1
SLC1A5	24h urine protein	g/d
70.96	2.17
163.735	4.62
160.75	5.3
115.16	3.17
139.88	3.19
135.28	12.52
137.905	4.85
142.525	4.02
155.735	4.94
206.765	14.6
140.32	5.08
133.975	1.51
125.555	7.4
121.925	5.88
150.545	4.95
156.625	5.27
138.125	4.89
115.79	5.43
136.37	5.25
112.85	1.03
96.95	3.28
138.78	7.73
78.065	1.66
141.42	3.2
135.935	3.77
140.98	7.11
125.77	4.22
122.14	2.57
126.415	1.11
135.715	9
144.965	1.54
192.8	6.78
120.65	2.27
135.715	2.66
114.32	0.63
123.42	3.16
135.065	10.51
114.11	0.9
128.78	7.35
101.86	3.44
146.745	1.24
123.205	2.11
136.155	5.93
127.27	4.1
130.72	7.09
144.965	6.45
138.78	4.4
153.25	3.17
144.965	5.7
100.835	2.11
