# Supplementary material for: Elevated SLC1A5 links to inflamed endothelial cells and proteinuria in membranous nephropathy patients
Source: PeerJ. 2025 Oct 31;13:e20271. doi: 10.7717/peerj.20271 (PMC12581921; doi:10.7717/peerj.20271)
Supplement: Supplemental Information 5 [file peerj-13-20271-s005.xlsx]

## Sheet: Sheet1
24h urine protein	SLC1A5
<3.5	70.96
>3.5	163.735
>3.5	160.75
<3.5	115.16
<3.5	139.88
>3.5	135.28
>3.5	137.905
>3.5	142.525
>3.5	155.735
>3.5	206.765
>3.5	140.32
<3.5	133.975
>3.5	125.555
>3.5	121.925
>3.5	150.545
>3.5	156.625
>3.5	138.125
>3.5	115.79
>3.5	136.37
<3.5	112.85
<3.5	96.95
>3.5	138.78
<3.5	78.065
<3.5	141.42
>3.5	135.935
>3.5	140.98
>3.5	125.77
<3.5	122.14
<3.5	126.415
>3.5	135.715
<3.5	144.965
>3.5	192.8
<3.5	120.65
<3.5	135.715
<3.5	114.32
<3.5	123.42
>3.5	135.065
<3.5	114.11
>3.5	128.78
<3.5	101.86
<3.5	146.745
<3.5	123.205
>3.5	136.155
>3.5	127.27
>3.5	130.72
>3.5	144.965
>3.5	138.78
<3.5	153.25
>3.5	144.965
<3.5	100.835
