# Supplementary material for: Elevated SLC1A5 links to inflamed endothelial cells and proteinuria in membranous nephropathy patients
Source: PeerJ. 2025 Oct 31;13:e20271. doi: 10.7717/peerj.20271 (PMC12581921; doi:10.7717/peerj.20271)
Supplement: Supplemental Information 6 [file peerj-13-20271-s006.xlsx]

## Sheet: Sheet1
tr	SLC1A5
Non-nephrotic syndrome	70.96
Non-nephrotic syndrome	163.735
Nephrotic syndrome	160.75
Non-nephrotic syndrome	115.16
Non-nephrotic syndrome	139.88
Nephrotic syndrome	135.28
Nephrotic syndrome	137.905
Nephrotic syndrome	142.525
Nephrotic syndrome	155.735
Nephrotic syndrome	206.765
Nephrotic syndrome	140.32
Non-nephrotic syndrome	133.975
Nephrotic syndrome	125.555
Nephrotic syndrome	121.925
Nephrotic syndrome	150.545
Nephrotic syndrome	156.625
Nephrotic syndrome	138.125
Nephrotic syndrome	115.79
Nephrotic syndrome	136.37
Non-nephrotic syndrome	112.85
Non-nephrotic syndrome	96.95
Nephrotic syndrome	138.78
Non-nephrotic syndrome	78.065
Non-nephrotic syndrome	141.42
Nephrotic syndrome	135.935
Nephrotic syndrome	140.98
Nephrotic syndrome	125.77
Non-nephrotic syndrome	122.14
Non-nephrotic syndrome	126.415
Nephrotic syndrome	135.715
Non-nephrotic syndrome	144.965
Non-nephrotic syndrome	192.8
Non-nephrotic syndrome	120.65
Non-nephrotic syndrome	135.715
Non-nephrotic syndrome	114.32
Non-nephrotic syndrome	123.42
Nephrotic syndrome	135.065
Non-nephrotic syndrome	114.11
Nephrotic syndrome	128.78
Non-nephrotic syndrome	101.86
Non-nephrotic syndrome	146.745
Non-nephrotic syndrome	123.205
Nephrotic syndrome	136.155
Nephrotic syndrome	127.27
Nephrotic syndrome	130.72
Non-nephrotic syndrome	144.965
Non-nephrotic syndrome	138.78
Non-nephrotic syndrome	153.25
Nephrotic syndrome	144.965
Non-nephrotic syndrome	100.835
